# Supplementary material for: Unmasking Suicidal Ideation for Asian American, Native Hawaiian, and Pacific Islander Youths Via Data Disaggregation
Source: PubMed Central journal article supplement (PMC11584931; doi:10.1001/jamanetworkopen.2024.46832), 2024-11-22
Supplement: jamanetwopen-e2446832-s002.pdf [file jamanetwopen-e2446832-s002.pdf]

## Data Sharing Statement

Lui. Unmasking Suicidal Ideation for Asian American, Native Hawaiian, and Pacific Islander Youths Via Data Disaggregation. *JAMA Netw Open*. Published November 22, 2024.  
doi:10.1001/jamanetworkopen.2024.46832

### Data

**Data available:** No

### Additional Information

**Explanation for why data not available:** Data are available upon request from WestEd California Healthy Kids Survey.
